# Supplementary material for: Developing a core outcome set for fistulising perianal Crohn’s disease
Source: PubMed Central journal article supplement — Gut. 2018 Feb 3;68(2):226–38. doi: 10.1136/gutjnl-2017-315503 (PMC6352412; doi:10.1136/gutjnl-2017-315503), 2018-02-03
Supplement: gutjnl-2017-315503supp001.pdf [file gutjnl-2017-315503supp001.pdf]

## **Search Strategy:**

### **Medline Search Strategy** (Other search Strategies available on request):

- 1 exp Crohn Disease/
- 2 crohn\*.tw.
- 3 1 or 2
- 4 exp Fistula/ or exp Rectal Fistula/
- 5 fistul\*.tw.
- 6 4 or 5
- 7 3 and 6
- 8 7 and 2010:2016.(sa\_year).
- 9 randomized controlled trial.pt.
- 10 controlled clinical trial.pt.
- 11 randomized controlled trials.sh.
- 12 random allocation.sh.
- 13 double blind method.sh.
- 14 single-blind method.sh.
- 15 9 or 10 or 11 or 12 or 13 or 14
- 16 exp animals/ not human/
- 17 15 not 16
- 18 clinical trial.pt.
- 19 (clin\$ adj25 trial\$).ti,ab.
- 20 ((singl\$ or doubl\$ or trebl\$ or tripl\$) adj25 (blind\$ or mask\$)).ti,ab.
- 21 placebos.sh.
- 22 placebo\$.ti,ab.
- 23 random\$.ti,ab.
- 24 research design.sh.
- 25 or/18-24
- 26 25 not 16
- 27 26 not 17
- 28 comparative study.sh.
- 29 exp evaluation studies/
- 30 follow up studies.sh.
- 31 prospective studies.sh.
- 32 (control\$ or prospective\$ or volunteer\$).ti,ab.
- 33 28 or 29 or 30 or 31 or 32
- 34 33 not 16
- 35 34 not (17 or 27)
- 36 17 or 27 or 35
- 37 7 and 36
- 38 37 and 2010:2016.(sa year).

### ***Supplementary file 1. Search terms***
