# Supplementary material for: Developing a core outcome set for fistulising perianal Crohn’s disease
Source: PubMed Central journal article supplement — Gut. 2018 Feb 3;68(2):226–38. doi: 10.1136/gutjnl-2017-315503 (PMC6352412; doi:10.1136/gutjnl-2017-315503), 2018-02-03
Supplement: gutjnl-2017-315503supp002.pdf [file gutjnl-2017-315503supp002.pdf]

| Themes | Outcomes                                                                                         | R1 - Panel SuRa   |         | R1 - Panel GaNu   |         | R1 - Panel Pa     |         | R1 - Overall      |         | R1 results      |
|--------|--------------------------------------------------------------------------------------------------|-------------------|---------|-------------------|---------|-------------------|---------|-------------------|---------|-----------------|
|        |                                                                                                  | <i>importance</i> |         | <i>importance</i> |         | <i>importance</i> |         | <i>importance</i> |         | Domain retained |
|        |                                                                                                  | High (%)          | Low (%) |                 |
| 2      | Faecal diversion or proctectomy                                                                  | 97                | 0       | 98                | 0       | 96                | 0       | 97                | 0       | yes             |
| 6      | Death                                                                                            | 97                | 3       | 100               | 0       | 91                | 5       | 96                | 3       | yes             |
| 2      | Development of a new fistula                                                                     | 89                | 0       | 97                | 0       | 92                | 0       | 93                | 0       | yes             |
| 2      | Incontinence to solid stool                                                                      | 89                | 0       | 94                | 0       | 93                | 1       | 92                | 0       | yes             |
| 2      | Perianal related hospitalisation                                                                 | 89                | 0       | 94                | 0       | 91                | 3       | 91                | 1       | yes             |
| 2      | Incontinence to liquid stool                                                                     | 83                | 0       | 92                | 0       | 96                | 0       | 91                | 0       | yes             |
| 2      | Perianal abscess on clinical assessment after intervention                                       | 86                | 2       | 89                | 0       | 92                | 6       | 89                | 3       | yes             |
| 2      | Surgical re-intervention                                                                         | 89                | 2       | 91                | 0       | 86                | 5       | 89                | 2       | yes             |
| 2      | Recurrence of fistula                                                                            | 86                | 0       | 94                | 0       | 81                | 0       | 87                | 0       | yes             |
| 6      | Medical complications specific to the immunosuppression (e.g. opportunistic infections, cancers) | 79                | 0       | 97                | 0       | 83                | 9       | 86                | 3       | yes             |
| 3      | Unable attend school/work                                                                        | 84                | 0       | 92                | 0       | 81                | 1       | 86                | 1       | yes             |
| 6      | Safety (adverse events) and toxicity                                                             | 83                | 0       | 88                | 0       | 77                | 3       | 82                | 1       | yes             |
| 2      | Pads for continence/leakage                                                                      | 73                | 0       | 91                | 0       | 81                | 3       | 82                | 1       | yes             |
| 3      | Social interaction avoidance                                                                     | 65                | 3       | 82                | 0       | 89                | 6       | 79                | 3       | yes             |

|   |                                                              |    |    |    |   |    |    |    |   |     |
|---|--------------------------------------------------------------|----|----|----|---|----|----|----|---|-----|
| 3 | Lifestyle alterations (pain/restriction of activities)       | 76 | 2  | 85 | 0 | 75 | 8  | 78 | 3 | yes |
| 6 | Neurological complications                                   | 73 | 6  | 85 | 6 | 76 | 12 | 78 | 8 | yes |
| 4 | Abscess on MRI following treatment                           | 73 | 5  | 91 | 0 | 68 | 3  | 77 | 2 | yes |
| 3 | Restriction of sexual activity                               | 63 | 3  | 79 | 0 | 86 | 3  | 77 | 2 | yes |
| 2 | Anal pain                                                    | 63 | 3  | 80 | 2 | 83 | 0  | 76 | 1 | yes |
| 4 | Fistula response on MRI imaging                              | 65 | 11 | 91 | 2 | 72 | 5  | 76 | 6 | yes |
| 6 | Cardio-respiratory complications                             | 70 | 3  | 76 | 6 | 81 | 7  | 76 | 5 | yes |
| 3 | Limitation to moderate activities                            | 70 | 0  | 74 | 0 | 79 | 1  | 74 | 1 | yes |
| 3 | Physically restricted in self care                           | 62 | 2  | 82 | 0 | 78 | 6  | 74 | 3 | yes |
| 4 | # Fistula T2 hyperintensity on MRI                           | 63 | 6  | 74 | 2 | 82 | 1  | 74 | 3 | yes |
| 1 | Patient-reported reduction in fistula drainage               | 65 | 3  | 74 | 0 | 79 | 1  | 73 | 2 | yes |
| 3 | Feeling depressed & down and hopelessness                    | 59 | 5  | 79 | 2 | 79 | 7  | 73 | 4 | yes |
| 7 | Duration of healing/improvement                              | 73 | 3  | 80 | 0 | 66 | 16 | 73 | 7 | yes |
| 3 | Modifying how you walk, sit or stand because of your fistula | 60 | 5  | 68 | 2 | 83 | 9  | 71 | 5 | yes |
| 3 | Anxiety & worries                                            | 57 | 8  | 74 | 3 | 81 | 1  | 71 | 4 | yes |
| 6 | Allergic reaction                                            | 70 | 2  | 79 | 5 | 64 | 5  | 71 | 4 | yes |

|   |                                                                                 |    |    |    |    |    |    |    |    |     |
|---|---------------------------------------------------------------------------------|----|----|----|----|----|----|----|----|-----|
| 3 | Avoidance of intimacy                                                           | 63 | 2  | 77 | 0  | 71 | 3  | 71 | 2  | yes |
| 3 | Change in lifestyle based on toileting needs                                    | 65 | 0  | 68 | 0  | 77 | 5  | 70 | 2  | yes |
| 2 | # Wound infection                                                               | 43 | 6  | 74 | 2  | 90 | 0  | 70 | 2  | yes |
| 3 | Change in general health - psychological                                        | 56 | 3  | 74 | 0  | 78 | 4  | 70 | 2  | yes |
| 6 | Surgical complications specific to the surgical procedure (e.g. plug extrusion) | 57 | 6  | 68 | 2  | 79 | 1  | 69 | 3  | yes |
| 3 | Embarrassment & feeling isolated                                                | 62 | 2  | 74 | 2  | 68 | 8  | 68 | 4  | yes |
| 2 | Discrimination between passing stool and gas                                    | 57 | 6  | 70 | 0  | 76 | 3  | 68 | 3  | yes |
| 1 | Complete fistula healing assessed clinically                                    | 67 | 2  | 82 | 3  | 57 | 15 | 68 | 7  | yes |
| 3 | Concerns about and impact on fertility, birth, parenthood and family            | 52 | 3  | 71 | 2  | 75 | 7  | 67 | 4  | yes |
| 4 | MRI assessment of fistula volume                                                | 46 | 19 | 76 | 3  | 76 | 1  | 67 | 7  | yes |
| 4 | # Fistula T1 enhancement on MRI                                                 | 43 | 14 | 73 | 6  | 81 | 3  | 67 | 7  | yes |
| 3 | Change in general health - physical                                             | 52 | 3  | 65 | 3  | 79 | 3  | 66 | 3  | yes |
| 6 | Grading system for surgical complications e.g. Clavien-Dindo                    | 59 | 11 | 62 | 14 | 76 | 5  | 66 | 10 | yes |
| 3 | Sleep disturbance                                                               | 51 | 6  | 64 | 8  | 80 | 4  | 66 | 6  | yes |
| 3 | # Lethargy and fatigue                                                          | 46 | 6  | 62 | 6  | 85 | 3  | 65 | 5  | yes |
| 5 | Fever                                                                           | 49 | 10 | 74 | 5  | 71 | 4  | 65 | 6  | yes |

|   |                                                                                   |    |    |    |    |    |   |    |    |     |
|---|-----------------------------------------------------------------------------------|----|----|----|----|----|---|----|----|-----|
| 2 | Faecal urgency                                                                    | 46 | 5  | 67 | 0  | 79 | 4 | 65 | 3  | yes |
| 3 | Tolerability of treatment                                                         | 56 | 2  | 64 | 5  | 73 | 5 | 64 | 4  | yes |
| 3 | A feeling of being unhygienic                                                     | 46 | 8  | 64 | 5  | 80 | 1 | 64 | 5  | yes |
| 1 | Rectal mucosal healing                                                            | 57 | 11 | 74 | 2  | 58 | 5 | 63 | 6  | yes |
| 6 | # Urinary complications                                                           | 44 | 0  | 59 | 5  | 84 | 3 | 63 | 3  | yes |
| 1 | Local perianal inflammation/induration assessed clinically                        | 48 | 5  | 58 | 3  | 82 | 0 | 63 | 3  | yes |
| 7 | * Biologic free remission                                                         | 68 | 2  | 56 | 14 | 64 | 6 | 63 | 7  | yes |
| 3 | * A quality of life score e.g. Short form survey 36 (SF-36)                       | 56 | 6  | 64 | 11 | 68 | 2 | 63 | 6  | yes |
| 2 | Plug for continence/leakage                                                       | 49 | 6  | 61 | 6  | 76 | 1 | 63 | 5  | yes |
| 3 | Modifying travel                                                                  | 48 | 5  | 65 | 2  | 72 | 3 | 62 | 3  | yes |
| 2 | Mucus leakage                                                                     | 44 | 3  | 68 | 2  | 71 | 0 | 62 | 1  | yes |
| 1 | Closure of internal opening                                                       | 54 | 19 | 56 | 11 | 71 | 6 | 61 | 12 | yes |
| 7 | Financial implications                                                            | 48 | 5  | 50 | 6  | 83 | 0 | 61 | 4  | yes |
| 5 | Time to loss of response to medical treatments                                    | 38 | 13 | 68 | 6  | 72 | 4 | 60 | 8  | yes |
| 1 | Closure of all the external openings on clinical examination                      | 52 | 8  | 62 | 6  | 64 | 2 | 60 | 5  | no  |
| 1 | Clinical assessment of drainage either spontaneously or on gentle finger pressure | 33 | 6  | 56 | 8  | 84 | 5 | 59 | 6  | yes |

|   |                                                                                                                                              |    |    |    |    |    |    |    |    |     |
|---|----------------------------------------------------------------------------------------------------------------------------------------------|----|----|----|----|----|----|----|----|-----|
| 4 | * An activity based MRI score e.g. Van Assche Score                                                                                          | 30 | 24 | 68 | 11 | 75 | 4  | 59 | 12 | yes |
| 1 | # Development of perianal features of Crohn's (other than fistula)                                                                           | 49 | 16 | 52 | 8  | 72 | 10 | 59 | 11 | yes |
| 1 | # A validated score to assess perianal disease activity e.g. Perianal disease activity index (PDAI)                                          | 38 | 22 | 58 | 8  | 77 | 3  | 59 | 11 | yes |
| 2 | Incontinence to wind                                                                                                                         | 44 | 13 | 61 | 5  | 69 | 0  | 58 | 6  | no  |
| 7 | Recovery time after intervention                                                                                                             | 40 | 6  | 55 | 3  | 77 | 0  | 58 | 3  | yes |
| 7 | Antibiotic free remission                                                                                                                    | 49 | 5  | 53 | 8  | 68 | 5  | 57 | 6  | no  |
| 3 | Restricted clothing choices                                                                                                                  | 38 | 3  | 53 | 8  | 75 | 3  | 56 | 4  | yes |
| 7 | Increasing analgesia                                                                                                                         | 48 | 0  | 59 | 2  | 60 | 12 | 56 | 5  | no  |
| 1 | ≥50% tracts not draining on clinical examination                                                                                             | 37 | 22 | 50 | 5  | 75 | 11 | 56 | 12 | yes |
| 4 | MRI assessment of rectum (proctitis)                                                                                                         | 32 | 29 | 50 | 11 | 82 | 0  | 56 | 13 | yes |
| 2 | * A combined faecal incontinence score e.g. the Vaizey Score, Cleveland Clinic Incontinence score, Faecal Incontinence Severity Index (FISI) | 40 | 21 | 62 | 11 | 62 | 0  | 55 | 10 | yes |
| 3 | Patient perception of continence compared to others OR baseline                                                                              | 44 | 2  | 55 | 9  | 62 | 14 | 54 | 9  | no  |
| 3 | Decisional regret of treatment choice                                                                                                        | 44 | 6  | 56 | 3  | 59 | 5  | 53 | 5  | no  |
| 3 | Body detachment                                                                                                                              | 40 | 6  | 58 | 5  | 61 | 6  | 53 | 6  | no  |
| 3 | Concern over further intervention                                                                                                            | 35 | 6  | 53 | 8  | 70 | 1  | 53 | 5  | yes |
| 3 | Irritable, frustrated and angry                                                                                                              | 33 | 11 | 53 | 8  | 70 | 1  | 53 | 6  | yes |

|   |                                                                                                            |    |    |    |    |    |    |    |    |     |
|---|------------------------------------------------------------------------------------------------------------|----|----|----|----|----|----|----|----|-----|
| 2 | Tenesmus or incomplete evacuation                                                                          | 37 | 8  | 52 | 5  | 67 | 1  | 52 | 4  | no  |
| 2 | # Anal bleeding                                                                                            | 22 | 24 | 53 | 6  | 76 | 5  | 52 | 11 | yes |
| 3 | Limitation to vigorous activities (e.g. running, lifting heavy objects, participating in strenuous sports) | 32 | 6  | 53 | 5  | 67 | 10 | 51 | 7  | no  |
| 1 | Partial fistula healing assessed clinically                                                                | 33 | 6  | 42 | 6  | 74 | 1  | 51 | 5  | yes |
| 4 | # Fistula response on endoanal USS                                                                         | 17 | 43 | 58 | 20 | 71 | 2  | 49 | 21 | yes |
| 5 | Objective blood markers of inflammation                                                                    | 25 | 24 | 48 | 12 | 65 | 1  | 47 | 12 | no  |
| 2 | Increased frequency of loose stool                                                                         | 27 | 10 | 50 | 3  | 59 | 4  | 46 | 6  | no  |
| 6 | Rash or other skin/hair problems                                                                           | 32 | 17 | 45 | 11 | 59 | 4  | 46 | 11 | no  |
| 5 | C-reactive protein (CRP)                                                                                   | 24 | 27 | 47 | 12 | 62 | 11 | 46 | 16 | no  |
| 6 | Nausea or vomiting                                                                                         | 38 | 14 | 50 | 15 | 48 | 6  | 46 | 12 | no  |
| 5 | Non-inflammatory blood markers ( <i>related biologics</i> )                                                | 27 | 25 | 45 | 18 | 61 | 3  | 45 | 15 | no  |
| 7 | Cost effectiveness                                                                                         | 29 | 17 | 44 | 12 | 54 | 5  | 42 | 12 | no  |
| 5 | Instability of weight (assessed by BMI)                                                                    | 30 | 29 | 39 | 15 | 42 | 6  | 37 | 16 | no  |
| 7 | Use anti-diarrhoeal drugs                                                                                  | 16 | 22 | 29 | 27 | 58 | 5  | 34 | 18 | no  |

#### THEME KEY

- 1 Fistula response to treatment (symptoms)
- 2 Direct impact of fistula on the patient

- 3 Impact on the patient as a person
- 4 Assessment with imaging techniques (scans)
- 5 Fistula response to treatment (tests)
- 6 Safety implications related to treatment
- 7 Impact on patient over time

\*SMG decision to change the name (or lay description) based on heterogeneity or comments by participants

# Items were retained due to polarising views/heterogeneity or comments by participants

## **Supplementary file 2. Round 1 voting**
