# Supplementary material for: Developing a core outcome set for fistulising perianal Crohn’s disease
Source: PubMed Central journal article supplement — Gut. 2018 Feb 3;68(2):226–38. doi: 10.1136/gutjnl-2017-315503 (PMC6352412; doi:10.1136/gutjnl-2017-315503), 2018-02-03
Supplement: gutjnl-2017-315503supp003.pdf [file gutjnl-2017-315503supp003.pdf]

| Theme | Outcome                                                                                          | R1 - Panel SuRa   |         | R2 - Panel GaNu   |         | R2 - Panel Pa     |         | R2 - Overall      |         | R2 results      |
|-------|--------------------------------------------------------------------------------------------------|-------------------|---------|-------------------|---------|-------------------|---------|-------------------|---------|-----------------|
|       |                                                                                                  | <i>importance</i> |         | <i>importance</i> |         | <i>importance</i> |         | <i>importance</i> |         | Domain retained |
|       |                                                                                                  | High (%)          | Low (%) |                 |
| 2     | Development of a new fistula                                                                     | 98                | 0       | 100               | 0       | 98                | 0       | 98                | 0       | yes             |
| 2     | Faecal diversion or proctectomy                                                                  | 98                | 0       | 100               | 0       | 100               | 0       | 97                | 0       | yes             |
| 6     | Death                                                                                            | 98                | 2       | 100               | 0       | 96                | 2       | 97                | 1       | yes             |
| 2     | Perianal related hospitalisation                                                                 | 96                | 0       | 98                | 0       | 98                | 0       | 97                | 0       | yes             |
| 2     | Incontinence to solid stool                                                                      | 98                | 0       | 98                | 0       | 98                | 2       | 97                | 1       | yes             |
| 2     | Recurrence of fistula                                                                            | 100               | 0       | 98                | 0       | 91                | 0       | 96                | 0       | yes             |
| 2     | Perianal abscess on clinical assessment after intervention                                       | 94                | 0       | 94                | 0       | 100               | 0       | 95                | 0       | yes             |
| 2     | Incontinence to liquid stool                                                                     | 91                | 0       | 98                | 0       | 98                | 2       | 94                | 1       | yes             |
| 6     | Medical complications specific to the immunosuppression (e.g. opportunistic infections, cancers) | 92                | 0       | 98                | 0       | 92                | 2       | 94                | 1       | yes             |
| 2     | Surgical re-intervention                                                                         | 94                | 0       | 96                | 0       | 89                | 2       | 93                | 1       | yes             |
| 3     | Unable attend school/work                                                                        | 94                | 0       | 94                | 0       | 87                | 7       | 91                | 2       | yes             |
| 2     | Pads for continence/leakage                                                                      | 86                | 0       | 96                | 0       | 96                | 0       | 91                | 0       | yes             |
| 6     | Safety (adverse events) and toxicity                                                             | 98                | 0       | 90                | 0       | 88                | 2       | 91                | 1       | yes             |
| 3     | Lifestyle alterations (pain/restriction of activities)                                           | 91                | 0       | 88                | 0       | 91                | 0       | 89                | 0       | yes             |

|   |                                                              |    |    |    |   |    |   |    |   |     |
|---|--------------------------------------------------------------|----|----|----|---|----|---|----|---|-----|
| 6 | Neurological complications                                   | 86 | 2  | 88 | 0 | 96 | 2 | 89 | 1 | yes |
| 7 | Duration of healing/improvement                              | 86 | 0  | 92 | 0 | 87 | 2 | 88 | 1 | yes |
| 4 | Abscess on MRI following treatment                           | 85 | 4  | 96 | 0 | 74 | 2 | 85 | 2 | yes |
| 4 | Fistula response on MRI imaging                              | 78 | 10 | 94 | 0 | 83 | 0 | 85 | 3 | yes |
| 3 | Social interaction avoidance                                 | 75 | 2  | 86 | 0 | 98 | 2 | 85 | 1 | yes |
| 3 | Restriction of sexual activity                               | 72 | 2  | 92 | 0 | 91 | 4 | 85 | 2 | yes |
| 2 | Anal pain                                                    | 76 | 0  | 88 | 2 | 92 | 2 | 85 | 1 | yes |
| 6 | Cardio-respiratory complications                             | 83 | 2  | 79 | 0 | 96 | 2 | 85 | 1 | yes |
| 2 | Patient-reported reduction in fistula drainage               | 76 | 0  | 84 | 0 | 89 | 2 | 82 | 1 | yes |
| 3 | Modifying how you walk, sit or stand because of your fistula | 76 | 2  | 78 | 0 | 91 | 4 | 81 | 2 | yes |
| 3 | Embarrassment & feeling isolated                             | 73 | 2  | 88 | 0 | 77 | 4 | 79 | 2 | yes |
| 3 | Limitation to moderate activities                            | 79 | 0  | 76 | 0 | 84 | 0 | 79 | 0 | yes |
| 2 | Complete fistula healing assessed clinically                 | 79 | 4  | 92 | 2 | 66 | 4 | 78 | 3 | yes |
| 3 | Feeling depressed & down and hopelessness                    | 68 | 4  | 82 | 0 | 87 | 9 | 78 | 4 | yes |
| 6 | Allergic reaction                                            | 76 | 0  | 80 | 0 | 82 | 2 | 78 | 1 | yes |

|   |                                                                      |    |    |    |   |    |    |    |   |     |
|---|----------------------------------------------------------------------|----|----|----|---|----|----|----|---|-----|
| 3 | Change in general health - psychological                             | 73 | 2  | 80 | 0 | 83 | 2  | 78 | 1 | yes |
| 3 | Avoidance of intimacy                                                | 71 | 0  | 84 | 0 | 78 | 2  | 77 | 1 | yes |
| 3 | Anxiety & worries                                                    | 71 | 6  | 69 | 0 | 93 | 0  | 77 | 2 | yes |
| 3 | Change in lifestyle based on toileting needs                         | 72 | 2  | 77 | 0 | 83 | 4  | 77 | 2 | yes |
| 2 | Discrimination between passing stool and gas                         | 62 | 2  | 76 | 0 | 90 | 2  | 75 | 1 | yes |
| 3 | Physically restricted in self care                                   | 67 | 0  | 82 | 0 | 78 | 7  | 74 | 2 | yes |
| 4 | MRI assessment of fistula volume                                     | 49 | 20 | 80 | 2 | 89 | 4  | 71 | 9 | yes |
| 3 | Change in general health - physical                                  | 53 | 2  | 69 | 2 | 92 | 0  | 71 | 1 | yes |
| 2 | § Reversal of defunctioning stoma                                    | 82 | 2  | 70 | 5 | 76 | 9  | 71 | 5 | yes |
| 2 | #§ Need to access medical care                                       | 51 | 7  | 67 | 3 | 93 | 2  | 69 | 4 | yes |
| 2 | #Wound infection                                                     | 30 | 0  | 81 | 2 | 96 | 0  | 68 | 1 | yes |
| 3 | Concerns about and impact on fertility, birth, parenthood and family | 51 | 2  | 83 | 0 | 79 | 5  | 68 | 2 | no  |
| 3 | Sleep disturbance                                                    | 54 | 6  | 68 | 4 | 85 | 2  | 68 | 4 | no  |
| 4 | #Hyperintensity on T2 weighted MRI                                   | 67 | 6  | 63 | 0 | 98 | 0  | 67 | 2 | yes |
| 3 | § Patient global satisfaction with management and outcome            | 63 | 0  | 79 | 4 | 67 | 10 | 67 | 4 | no  |

|   |                                                                                 |    |    |    |    |    |    |    |   |     |
|---|---------------------------------------------------------------------------------|----|----|----|----|----|----|----|---|-----|
| 3 | Tolerability of treatment                                                       | 60 | 0  | 65 | 2  | 78 | 0  | 67 | 1 | no  |
| 2 | Faecal urgency                                                                  | 44 | 2  | 70 | 0  | 88 | 4  | 66 | 2 | no  |
| 7 | Period of time off biologics/anti-TNFs/immunosuppression                        | 75 | 0  | 58 | 8  | 67 | 10 | 65 | 6 | no  |
| 6 | Surgical complications specific to the surgical procedure (e.g. plug extrusion) | 56 | 4  | 72 | 0  | 81 | 2  | 64 | 2 | no  |
| 3 | A feeling of being unhygienic                                                   | 42 | 8  | 64 | 4  | 89 | 4  | 64 | 5 | no  |
| 2 | Rectal mucosal healing                                                          | 65 | 2  | 77 | 2  | 47 | 13 | 62 | 6 | no  |
| 6 | #Urinary complications                                                          | 33 | 0  | 58 | 2  | 98 | 2  | 62 | 1 | yes |
| 2 | #Development of perianal features of Crohn's (other than fistula)               | 52 | 8  | 46 | 4  | 92 | 0  | 62 | 4 | yes |
| 3 | #Lethargy and fatigue                                                           | 33 | 4  | 60 | 4  | 96 | 0  | 62 | 3 | yes |
| 3 | Modifying travel                                                                | 48 | 4  | 61 | 0  | 78 | 4  | 61 | 3 | no  |
| 2 | Mucus leakage                                                                   | 34 | 2  | 76 | 2  | 77 | 0  | 61 | 1 | no  |
| 2 | Plug for continence/leakage                                                     | 40 | 2  | 63 | 2  | 86 | 2  | 60 | 2 | no  |
| 2 | Closure of internal opening                                                     | 56 | 14 | 48 | 10 | 80 | 4  | 60 | 9 | no  |
| 2 | Local perianal inflammation/induration assessed clinically                      | 35 | 4  | 61 | 0  | 85 | 2  | 59 | 2 | no  |
| 5 | Time to loss of response to medical treatments                                  | 22 | 4  | 75 | 0  | 86 | 0  | 59 | 1 | no  |

|   |                                                                                                    |    |    |    |    |    |    |    |    |     |
|---|----------------------------------------------------------------------------------------------------|----|----|----|----|----|----|----|----|-----|
| 5 | Fever                                                                                              | 32 | 12 | 71 | 4  | 76 | 2  | 59 | 6  | no  |
| 2 | Clinical assessment of drainage either spontaneously or on gentle finger pressure                  | 17 | 4  | 68 | 6  | 87 | 2  | 56 | 4  | no  |
| 5 | § Non-inflammatory blood markers for therapeutic drug monitoring (biologics- efficacy)             | 28 | 14 | 60 | 11 | 84 | 0  | 55 | 7  | no  |
| 2 | § Need for ongoing seton                                                                           | 40 | 14 | 49 | 5  | 82 | 8  | 54 | 9  | no  |
| 3 | *A global assessment of quality of life                                                            | 42 | 6  | 54 | 6  | 70 | 6  | 54 | 6  | yes |
| 7 | Financial implications                                                                             | 42 | 2  | 39 | 0  | 83 | 6  | 54 | 3  | no  |
| 4 | #Fistula T1 enhancement on MRI                                                                     | 20 | 10 | 71 | 2  | 91 | 0  | 54 | 4  | yes |
| 6 | Grading system for surgical complications e.g. Clavien-Dindo                                       | 50 | 9  | 45 | 11 | 83 | 10 | 53 | 9  | no  |
| 2 | *A validated score to assess perianal disease activity e.g. Perianal disease activity index (PDAI) | 21 | 23 | 59 | 2  | 79 | 6  | 52 | 10 | yes |
| 7 | Recovery time after intervention                                                                   | 30 | 2  | 47 | 2  | 79 | 8  | 51 | 4  | no  |
| 4 | *An activity based MRI score e.g. Van Assche Score                                                 | 10 | 24 | 67 | 6  | 83 | 0  | 51 | 10 | yes |
| 2 | ≥50% tracts not draining on clinical examination                                                   | 18 | 16 | 48 | 8  | 87 | 0  | 50 | 8  | no  |
| 3 | Restricted clothing choices                                                                        | 29 | 4  | 42 | 8  | 81 | 2  | 49 | 5  | no  |
| 2 | *A global assessment of incontinence that covers all aspects of leakage                            | 19 | 15 | 69 | 4  | 60 | 7  | 48 | 8  | yes |
| 4 | MRI assessment of rectum (proctitis)                                                               | 22 | 32 | 37 | 12 | 85 | 0  | 47 | 14 | no  |

|   |                                                    |    |    |    |    |    |    |    |    |            |
|---|----------------------------------------------------|----|----|----|----|----|----|----|----|------------|
| 3 | <b>Irritable, frustrated and angry</b>             | 20 | 16 | 42 | 8  | 83 | 4  | 47 | 9  | <i>no</i>  |
| 2 | <b>#Anal bleeding</b>                              | 8  | 16 | 32 | 4  | 94 | 0  | 44 | 7  | <i>yes</i> |
| 3 | <b>Concern over further intervention</b>           | 24 | 6  | 35 | 4  | 71 | 6  | 42 | 5  | <i>no</i>  |
| 2 | <b>Partial fistula healing assessed clinically</b> | 18 | 9  | 33 | 0  | 76 | 2  | 42 | 4  | <i>no</i>  |
| 4 | <b>Fistula response on endoanal Ultrasound</b>     | 2  | 55 | 44 | 13 | 69 | 16 | 35 | 27 | <i>no</i>  |

**THEME KEY**

- 1 Fistula response to treatment (symptoms)
- 2 Direct impact of fistula on the patient
- 3 Impact on the patient as a person
- 4 Assessment with imaging techniques (scans)
- 5 Fistula response to treatment (tests)
- 6 Safety implications related to treatment
- 7 Impact on patient over time

§ De novo outcomes added after round one

\*Outcomes which did not meet consensus but were retained by SMG

# Retained due to a high patients scoring (≥90%)

**Supplementary file 3. Round 2 voting**
