# Supplementary material for: Developing a core outcome set for fistulising perianal Crohn’s disease
Source: PubMed Central journal article supplement — Gut. 2018 Feb 3;68(2):226–38. doi: 10.1136/gutjnl-2017-315503 (PMC6352412; doi:10.1136/gutjnl-2017-315503), 2018-02-03
Supplement: gutjnl-2017-315503supp004.pdf [file gutjnl-2017-315503supp004.pdf]

| THEME | OUTCOME                                                                                          | R3 - Panel SuRa   |         | R3 - Panel GaNu   |         | R3 - Panel Pa     |         | R3 - Overall      |         | R3 results      |
|-------|--------------------------------------------------------------------------------------------------|-------------------|---------|-------------------|---------|-------------------|---------|-------------------|---------|-----------------|
|       |                                                                                                  | <i>importance</i> |         | <i>importance</i> |         | <i>importance</i> |         | <i>importance</i> |         | Domain retained |
|       |                                                                                                  | High (%)          | Low (%) |                 |
| 2     | Development of a new fistula                                                                     | 97%               | 2%      | 98%               | 2%      | 97%               | 3%      | 97%               | 2%      | yes             |
| 6     | Death                                                                                            | 97%               | 2%      | 97%               | 2%      | 90%               | 10%     | 95%               | 3%      | yes             |
| 2     | Recurrence of fistula                                                                            | 95%               | 3%      | 97%               | 2%      | 93%               | 3%      | 95%               | 2%      | yes             |
| 2     | Faecal diversion or proctectomy                                                                  | 95%               | 2%      | 95%               | 2%      | 92%               | 5%      | 94%               | 2%      | yes             |
| 3     | Unable attend school/work                                                                        | 95%               | 2%      | 95%               | 2%      | 80%               | 8%      | 90%               | 3%      | yes             |
| 7     | Duration of healing/improvement                                                                  | 95%               | 0%      | 84%               | 5%      | 90%               | 8%      | 90%               | 3%      | yes             |
| 6     | Safety (adverse events) and toxicity                                                             | 95%               | 2%      | 86%               | 6%      | 81%               | 8%      | 87%               | 3%      | yes             |
| 2     | Incontinence to solid stool                                                                      | 93%               | 2%      | 97%               | 3%      | 95%               | 5%      | 95%               | 2%      | yes             |
| 2     | Perianal related hospitalisation                                                                 | 93%               | 3%      | 97%               | 3%      | 92%               | 7%      | 94%               | 3%      | yes             |
| 3     | Lifestyle alterations (pain/restriction of activities)                                           | 92%               | 2%      | 92%               | 2%      | 90%               | 5%      | 91%               | 2%      | yes             |
| 6     | Medical complications specific to the immunosuppression (e.g. opportunistic infections, cancers) | 92%               | 2%      | 91%               | 2%      | 92%               | 7%      | 91%               | 3%      | yes             |
| 2     | Surgical re-intervention                                                                         | 92%               | 5%      | 94%               | 2%      | 86%               | 12%     | 91%               | 4%      | yes             |
| 4     | Abscess on MRI following treatment                                                               | 92%               | 7%      | 94%               | 2%      | 83%               | 7%      | 90%               | 4%      | yes             |
| 2     | Reversal of defunctioning stoma                                                                  | 90%               | 3%      | 81%               | 3%      | 69%               | 8%      | 80%               | 4%      | yes             |

|   |                                                                     |     |    |     |    |     |     |     |    |     |
|---|---------------------------------------------------------------------|-----|----|-----|----|-----|-----|-----|----|-----|
| 2 | <b>Perianal abscess on clinical assessment after intervention</b>   | 88% | 7% | 97% | 2% | 93% | 7%  | 93% | 3% | yes |
| 2 | <b>Incontinence to liquid stool</b>                                 | 87% | 5% | 95% | 3% | 93% | 5%  | 92% | 2% | yes |
| 1 | <b>Patient-reported reduction in fistula drainage</b>               | 87% | 2% | 84% | 2% | 93% | 5%  | 88% | 2% | yes |
| 1 | <b>Complete fistula healing assessed clinically</b>                 | 87% | 2% | 83% | 6% | 81% | 7%  | 84% | 4% | yes |
| 2 | <b>Pads for continence/leakage</b>                                  | 85% | 2% | 95% | 2% | 95% | 3%  | 92% | 2% | yes |
| 3 | <b>Social interaction avoidance</b>                                 | 83% | 2% | 80% | 3% | 92% | 7%  | 85% | 3% | yes |
| 3 | <b>Restriction of sexual activity</b>                               | 83% | 2% | 88% | 2% | 81% | 8%  | 84% | 3% | yes |
| 3 | <b>Modifying how you walk, sit or stand because of your fistula</b> | 82% | 3% | 88% | 2% | 90% | 7%  | 86% | 3% | yes |
| 6 | <b>Neurological complications</b>                                   | 82% | 8% | 88% | 6% | 86% | 10% | 85% | 6% | yes |
| 2 | <b>Anal pain</b>                                                    | 82% | 3% | 83% | 2% | 88% | 8%  | 84% | 3% | yes |
| 3 | <b>Avoidance of intimacy</b>                                        | 82% | 5% | 86% | 2% | 83% | 5%  | 84% | 3% | yes |
| 3 | <b>Change in lifestyle based on toileting needs</b>                 | 82% | 3% | 80% | 2% | 80% | 10% | 80% | 4% | yes |
| 3 | <b>Physically restricted in caring for oneself</b>                  | 80% | 5% | 88% | 2% | 78% | 8%  | 82% | 4% | yes |
| 3 | <b>Embarrassment &amp; feeling isolated</b>                         | 80% | 2% | 83% | 5% | 80% | 5%  | 81% | 3% | yes |
| 3 | <b>Limitation to moderate activities</b>                            | 80% | 3% | 78% | 2% | 83% | 5%  | 80% | 3% | yes |
| 2 | <b>Discrimination between passing stool and gas</b>                 | 78% | 3% | 78% | 3% | 88% | 7%  | 81% | 3% | yes |

|   |                                                                                                          |     |     |     |    |     |     |     |     |     |
|---|----------------------------------------------------------------------------------------------------------|-----|-----|-----|----|-----|-----|-----|-----|-----|
| 6 | <b>Cardio-respiratory complications</b>                                                                  | 78% | 10% | 80% | 8% | 86% | 10% | 81% | 7%  | yes |
| 3 | <b>Feeling depressed &amp; down, hopelessness and unable to cope</b>                                     | 77% | 7%  | 83% | 3% | 86% | 10% | 82% | 6%  | yes |
| 6 | <b>Allergic reaction</b>                                                                                 | 77% | 3%  | 73% | 6% | 78% | 10% | 76% | 5%  | yes |
| 4 | <b>Hyperintensity on T2 weighted MRI</b>                                                                 | 77% | 8%  | 56% | 5% | 88% | 7%  | 73% | 5%  | yes |
| 4 | <b>Fistula response on MRI imaging</b>                                                                   | 75% | 15% | 89% | 3% | 90% | 5%  | 85% | 5%  | yes |
| 3 | <b>Change in general health - psychological</b>                                                          | 75% | 5%  | 80% | 3% | 83% | 8%  | 79% | 4%  | yes |
| 3 | <b>Anxiety &amp; worries</b>                                                                             | 73% | 8%  | 70% | 3% | 86% | 7%  | 77% | 5%  | yes |
| 1 | <b>Development of other perianal features</b>                                                            | 68% | 7%  | 61% | 6% | 92% | 2%  | 73% | 4%  | yes |
| 3 | <b>Change in physical ability to do things</b>                                                           | 65% | 3%  | 72% | 6% | 86% | 8%  | 74% | 4%  | yes |
| 4 | <b>MRI assessment of fistula volume</b>                                                                  | 52% | 13% | 80% | 2% | 86% | 5%  | 73% | 6%  | yes |
| 3 | <b>A global assessment of quality of life</b>                                                            | 48% | 8%  | 69% | 6% | 75% | 12% | 64% | 8%  | yes |
| 3 | <b>Lethargy and fatigue</b>                                                                              | 43% | 10% | 56% | 8% | 83% | 7%  | 61% | 7%  | yes |
| 6 | <b>Urinary complications</b>                                                                             | 37% | 7%  | 61% | 8% | 85% | 10% | 61% | 6%  | yes |
| 2 | <b>Wound infection</b>                                                                                   | 28% | 7%  | 78% | 5% | 92% | 3%  | 66% | 3%  | yes |
| 1 | <b>A validated score to assess perianal disease activity e.g. Perianal disease activity index (PDAI)</b> | 27% | 17% | 52% | 9% | 81% | 10% | 53% | 11% | yes |
| 2 | <b>A global assessment of incontinence that covers all aspects of leakage</b>                            | 20% | 10% | 78% | 5% | 69% | 8%  | 56% | 6%  | yes |

|   |                                                          |     |     |     |    |     |    |     |    |     |
|---|----------------------------------------------------------|-----|-----|-----|----|-----|----|-----|----|-----|
| 4 | <b>Fistula T1 enhancement on MRI</b>                     | 17% | 10% | 55% | 3% | 86% | 5% | 52% | 5% | yes |
| 2 | <b>Anal bleeding</b>                                     | 12% | 17% | 36% | 8% | 86% | 5% | 44% | 9% | yes |
| 4 | <b>An activity based MRI score e.g. Van Assche Score</b> | 10% | 18% | 64% | 5% | 78% | 5% | 51% | 9% | yes |

**THEME KEY**

- 1 Fistula response to treatment (symptoms)
- 2 Direct impact of fistula on the patient
- 3 Impact on the patient as a person
- 4 Assessment with imaging techniques (scans)
- 5 Fistula response to treatment (tests)
- 6 Safety implications related to treatment
- 7 Impact on patient over time

**Supplementary file 4. Round 3 voting**
