# Supplementary material for: Developing a core outcome set for fistulising perianal Crohn’s disease
Source: PubMed Central journal article supplement — Gut. 2018 Feb 3;68(2):226–38. doi: 10.1136/gutjnl-2017-315503 (PMC6352412; doi:10.1136/gutjnl-2017-315503), 2018-02-03
Supplement: gutjnl-2017-315503supp005.pdf [file gutjnl-2017-315503supp005.pdf]

| Author               | Year | Title                                                                                                                                             | Study design                        | Intervention | Total number of patients | Number of patients receiving treatment for fistula | Number of Outcome Measures | Core criteria for complete high quality reporting |                                       |                                        |                                         |                                 |
|----------------------|------|---------------------------------------------------------------------------------------------------------------------------------------------------|-------------------------------------|--------------|--------------------------|----------------------------------------------------|----------------------------|---------------------------------------------------|---------------------------------------|----------------------------------------|-----------------------------------------|---------------------------------|
|                      |      |                                                                                                                                                   |                                     |              |                          |                                                    |                            | Primary outcome clearly stated (73%)              | Primary outcome clearly defined (76%) | Secondary outcome clearly stated (57%) | Secondary outcome clearly defined (63%) | Use of outcomes explained (33%) |
| <i>Echarri</i>       | 2010 | Evaluation of adalimumab therapy in multidisciplinary strategy for perianal Crohn's disease patients with infliximab failure                      | Prospective cohort (multi-centre)   | Combined     | 16                       | 16                                                 | 8                          |                                                   |                                       | y                                      | y                                       |                                 |
| <i>Glgorijević</i>   | 2010 | The role of pelvic MRI in assessment of combined surgical and infliximab treatment for perianal Crohn's disease.                                  | Prospective cohort                  | Combination  | 24                       | 24                                                 | 6                          |                                                   | y                                     |                                        | y                                       |                                 |
| <i>Grimaud</i>       | 2010 | Fibrin glue is effective healing perianal fistulas in patients with Crohn's disease.                                                              | Randomised clinical trial           | Combination  | 77                       | 77                                                 | 2                          | y                                                 | y                                     | y                                      | y                                       | y                               |
| <i>Horsthuis</i>     | 2010 | Evaluation of an MRI-based score of disease activity in perianal fistulizing Crohn's disease.                                                     | Prospective cohort                  | Medical      | 19                       | 19                                                 | 7                          | y                                                 | y                                     |                                        | y                                       | y                               |
| <i>Sciaudone</i>     | 2010 | Treatment of complex perianal fistulas in Crohn's disease: infliximab, surgery or combined approach.                                              | Clinical controlled trial           | Combined     | 35                       | 35                                                 | 7                          |                                                   | y                                     |                                        |                                         |                                 |
| <i>Soltani</i>       | 2010 | Endorectal advancement flap for cryptoglandular or Crohn's fistula-in-ano.                                                                        | Systematic review                   | Surgical     | 1243                     | 91                                                 | 3                          | y                                                 |                                       | y                                      |                                         |                                 |
| <i>Alessandroni</i>  | 2011 | Local injection of infliximab in severe fistulating perianal Crohn's disease: an open uncontrolled study.                                         | Prospective cohort                  | Medical      | 12                       | 12                                                 | 4                          | y                                                 |                                       |                                        |                                         |                                 |
| <i>Alvarez</i>       | 2011 | Surgical repair and biological therapy for fecal incontinence in Crohn's disease involving both sphincter defects and complex fistulas.           | Prospective cohort                  | Combination  | 10                       | 10                                                 | 6                          | y                                                 | y                                     |                                        |                                         |                                 |
| <i>Ciccocioppo</i>   | 2011 | Autologous bone marrow-derived mesenchymal stromal cells in the treatment of fistulising Crohn's disease.                                         | Prospective cohort                  | Surgical     | 12                       | 12                                                 | 8                          |                                                   | y                                     |                                        | y                                       |                                 |
| <i>Khan</i>          | 2011 | Antibiotic therapy in inflammatory bowel disease: a systematic review and meta-analysis.                                                          | Systematic review and meta analysis | Medical      | 2008                     | 123                                                | 1                          | y                                                 |                                       |                                        |                                         |                                 |
| <i>Roumeguère</i>    | 2011 | Combined approach with infliximab, surgery, and methotrexate in severe fistulizing anoperineal Crohn's disease: results from a prospective study. | Prospective cohort (multi-centre)   | Medical      | 34                       | NR                                                 | 6                          | y                                                 | y                                     | y                                      | y                                       |                                 |
| <i>Savoie-Collet</i> | 2011 | Fistulizing perianal Crohn's disease: contrast-enhanced magnetic resonance imaging assessment at 1 year on maintenance anti-TNF-alpha therapy.    | Prospective cohort                  | Medical      | 20                       | 20                                                 | 4                          |                                                   | y                                     |                                        | y                                       |                                 |
| <i>Schreiber</i>     | 2011 | Randomised clinical trial: certolizumab pegol for fistulas in Crohn's disease - subgroup results from a placebo-controlled study.                 | Randomised clinical trial           | Medical      | 58                       | 58                                                 | 6                          |                                                   | y                                     |                                        | y                                       |                                 |
| <i>Sileri</i>        | 2011 | Surgery for fistula-in-ano in a specialist colorectal unit: a critical appraisal.                                                                 | Prospective cohort                  | Surgical     | 247                      | 26                                                 | 7                          |                                                   |                                       |                                        |                                         |                                 |

|                     |      |                                                                                                                                                                                                       |                                              |             |      |    |   |   |   |   |   |   |
|---------------------|------|-------------------------------------------------------------------------------------------------------------------------------------------------------------------------------------------------------|----------------------------------------------|-------------|------|----|---|---|---|---|---|---|
| <b>Panaccione</b>   | 2011 | Efficacy and safety of adalimumab in Canadian patients with moderate to severe Crohn's disease: Results of the Adalimumab in Canadian Subjects with Moderate to Severe Crohn's Disease (ACCESS) trial | Phase III trial                              | Medical     | 304  | NR | 8 | y | y | y | y | y |
| <b>Loftus</b>       | 2011 | Risk-benefit Analysis of Adalimumab Versus Traditional Non- Biologic Therapies for Patients with Crohn's Disease                                                                                      | Systematic review                            | Medical     | 3160 | NR | 7 | y |   | y |   | y |
| <b>Dretze</b>       | 2011 | A systematic review and economic evaluation of the use of tumour necrosis factor-alpha (TNF- $\alpha$ ) inhibitors, adalimumab and infliximab, for Crohn's disease                                    | Systematic review                            | Medical     | 1783 | NR | 7 | y | y | y | y | y |
| <b>Duff</b>         | 2012 | Infliximab and surgical treatment of complex anal Crohn's disease.                                                                                                                                    | Retrospective analysis of prospective cohort | Medical     | 52   | 52 | 3 | y |   |   |   |   |
| <b>O'Riordan</b>    | 2012 | A systematic review of the anal fistula plug for patients with Crohn's and non-Crohn's related fistula-in-ano.                                                                                        | Systematic review                            | Surgical    | 530  | 42 | 3 | y | y |   | y |   |
| <b>Tozer</b>        | 2012 | Long-term MRI-guided combined anti-TNF-alpha and thiopurine therapy for Crohn's perianal fistulas                                                                                                     | Prospective cohort                           | Medical     | 41   | 33 | 8 | y | y | y | y | y |
| <b>Antakia</b>      | 2013 | Combined modality treatment for complex fistulating perianal Crohn's disease.                                                                                                                         | Prospective cohort                           | Combination | 48   | 48 | 3 | y | y |   |   |   |
| <b>Cho</b>          | 2013 | Autologous adipose tissue-derived stem cells for the treatment of Crohn's fistula: a phase I clinical study.                                                                                          | Phase 1 clinical study                       | Surgical    | 10   | 10 | 4 | y |   | y |   |   |
| <b>delaPortilla</b> | 2013 | Expanded allogeneic adipose-derived stem cells (eASCs) for the treatment of complex perianal fistula in Crohn's disease: results from a multicenter phase I/IIa clinical trial.                       | Clinical trial                               | Surgical    | 24   | 24 | 8 | y | y | y | y |   |
| <b>Lee</b>          | 2013 | Autologous adipose tissue-derived stem cells treatment demonstrated favorable and sustainable therapeutic effect for Crohn's fistula.                                                                 | Phase 2 clinical study (multi-centre)        | Surgical    | 43   | 43 | 7 | y | y | y | y |   |
| <b>Schwandner</b>   | 2013 | Video-assisted anal fistula treatment (VAAFT) combined with advancement flap repair in Crohn's disease.                                                                                               | Prospective cohort                           | Medical     | 11   | 10 | 4 | y | y |   | y |   |
| <b>Da</b>           | 2013 | Adalimumab for Crohn's disease after infliximab treatment failure: a systematic review                                                                                                                | Systematic review                            | Medical     | 1009 | NR | 6 | y | y | y | y | y |
| <b>Steenhardt</b>   | 2013 | Individualised therapy is more cost-effective than dose intensification in patients with Crohn's disease who lose response to anti-TNF treatment: a randomised, controlled trial                      | Randomised clinical trial                    | Medical     | 69   | 14 | 7 | y | y | y | y | y |
| <b>Panaccione</b>   | 2013 | Adalimumab maintains remission of Crohn's disease after up to 4 years of treatment: data from CHARM and ADHERE                                                                                        | RCT (long term follow up)                    | Medical     | 329  | 70 | 5 | y | y | y | y | y |
| <b>Kawalec</b>      | 2013 | Tumour necrosis factor- $\alpha$ antibodies (infliximab, adalimumab and certolizumab) in Crohn's disease: systematic review and meta-analysis                                                         | SR and MA                                    | Medical     | 4464 | NR | 6 |   |   |   |   |   |
| <b>Chande</b>       | 2013 | Azathioprine or 6-mercaptopurine for induction of remission in Crohn's disease (Review)                                                                                                               | SR and MA                                    | Medical     | 1211 | 18 | 7 | y | y | y |   | y |

|                  |      |                                                                                                                                                                                           |                                                            |          |      |     |    |   |   |   |   |   |
|------------------|------|-------------------------------------------------------------------------------------------------------------------------------------------------------------------------------------------|------------------------------------------------------------|----------|------|-----|----|---|---|---|---|---|
| <b>Dewint</b>    | 2014 | Adalimumab combined with ciprofloxacin is superior to adalimumab monotherapy in perianal fistula closure in Crohn's disease: a randomised, double-blind, placebo controlled trial (ADAFI) | Randomised clinical trial                                  | Surgical | 76   | 76  | 7  | y | y | y | y | y |
| <b>Gingold</b>   | 2014 | A prospective evaluation of the ligation of the intersphincteric tract procedure for complex anal fistula in patients with Crohn's disease.                                               | Prospective cohort                                         | Surgical | 15   | 15  | 4  | y | y | y | y |   |
| <b>Hall</b>      | 2014 | Outcomes after operations for fistula-in-ano: Results of a prospective, multicenter, regional study                                                                                       | Retrospective analysis of prospective cohort (multicentre) | Surgical | 158  | 29  | 2  | y | y |   |   |   |
| <b>Reinisch</b>  | 2014 | AST-120 (spherical carbon adsorbent) in the treatment of perianal fistulae in mild-to-moderate Crohn's disease: FFAST-1, a phase 3, multicenter, placebo-controlled study                 | Randomised clinical trial                                  | Surgical | 249  | 249 | 4  | y | y | y | y | y |
| <b>Yassin</b>    | 2014 | Systematic review: the combined surgical and medical treatment of fistulising perianal Crohn's disease.                                                                                   | Systematic review and meta analysis                        | Combined | 1139 | NR  | 3  | y | y |   |   |   |
| <b>Song</b>      | 2014 | Efficacy and safety of adalimumab for the Crohn's disease: a systematic review and meta-analysis of published randomized placebo-controlled trials                                        | Randomised clinical trial                                  | Medical  | 1676 | NR  | 8  |   | y | y | y |   |
| <b>Asma</b>      | 2014 | Stem cell transplantation as rescue therapy for refractory Crohn's disease: a systematic review                                                                                           | Systematic review                                          | Surgical | 115  | 65  | 15 |   | y |   | y |   |
| <b>Göttgens</b>  | 2015 | Treatment of Crohn's disease-related high perianal fistulas combining the mucosa advancement flap with platelet-rich plasma: a pilot study.                                               | Prospective cohort                                         | Surgical | 10   | 10  | 3  |   | y |   | y | y |
| <b>Molendijk</b> | 2015 | Allogeneic Bone Marrow-Derived Mesenchymal Stromal Cells Promote Healing of Refractory Perianal Fistulas in Patients With Crohn's Disease.                                                | Randomised clinical trial                                  | Surgical | 21   | 21  | 12 | y | y | y | y |   |
| <b>Sirany</b>    | 2015 | The ligation of the intersphincteric fistula tract procedure for anal fistula: a mixed bag of results.                                                                                    | Systematic review                                          | Surgical | 683  | 15  | 4  | y | y | y |   |   |
| <b>Su</b>        | 2015 | Use of antibiotics in patients with Crohn's disease: A systematic review and meta analysis                                                                                                | Systematic review and meta analysis                        | Surgical | 1407 | 112 | 3  | y | y |   |   |   |
| <b>Wiese</b>     | 2015 | Use of Endoscopic Ultrasound to Guide Adalimumab Treatment in Perianal Crohn's Disease Results in Faster Fistula Healing.                                                                 | Prospective cohort (randomised)                            | Medical  | 20   | 20  | 4  | y | y | y | y | y |
| <b>Wu</b>        | 2015 | Meta-analysis of ciprofloxacin in treatment of Crohn's disease.                                                                                                                           | Meta analysis                                              | Medical  | 293  | 112 | 2  | y |   | y |   |   |
| <b>Yang</b>      | 2015 | Long-term outcome of infliximab combined with surgery for perianal fistulizing Crohn's disease                                                                                            | Prospective cohort                                         | Medical  | 28   | 28  | 8  |   | y |   | y |   |
| <b>Inamdar</b>   | 2015 | Smoking and Early Infliximab Response in Crohn's Disease: a Meta-analysis                                                                                                                 | Meta-analysis                                              | Medical  | 1658 | NR  | 6  |   |   | y | y |   |
| <b>Jones</b>     | 2015 | Effects of Concomitant Immunomodulator Therapy on Efficacy and Safety of Anti-Tumour Necrosis Factor Therapy for Crohn's Disease: A Meta-analysis of Placebo-controlled Trials            | Systematic review and meta analysis                        | Medical  | 1601 | NR  | 5  | y | y | y | y | y |

|                 |      |                                                                                                                                           |                                     |             |      |      |   |   |   |   |   |   |
|-----------------|------|-------------------------------------------------------------------------------------------------------------------------------------------|-------------------------------------|-------------|------|------|---|---|---|---|---|---|
| <b>deGroof</b>  | 2016 | Treatment of perianal fistulas in Crohn's disease: a systematic review and meta-analysis comparing seton drainage and anti-TNF treatment. | Systematic review and meta analysis | Combination | 1754 | 1754 | 3 | y |   | y |   | y |
| <b>Nasseri</b>  | 2016 | The anal fistula plug in Crohn's disease patients with fistula-in-ano: a systematic review.                                               | Systematic review                   | Surgical    | 84   | 84   | 3 | y | y | y | y |   |
| <b>Senéjoux</b> | 2016 | Fistula Plug in Fistulising Ano-Perineal Crohn's Disease: a Randomised Controlled Trial.                                                  | Randomised clinical trial           | Surgical    | 106  | 54   | 6 | y | y | y | y |   |

**Supplementary file 5. Included studies**
